# Supplementary material for: The soluble guanylate cyclase activator cinaciguat prevents cardiac dysfunction in a rat model of type-1 diabetes mellitus
Source: Springer Nature journal article supplement (doi:10.1186/s12933-015-0309-x), 2015-10-31

# Suppl. Fig. 1.

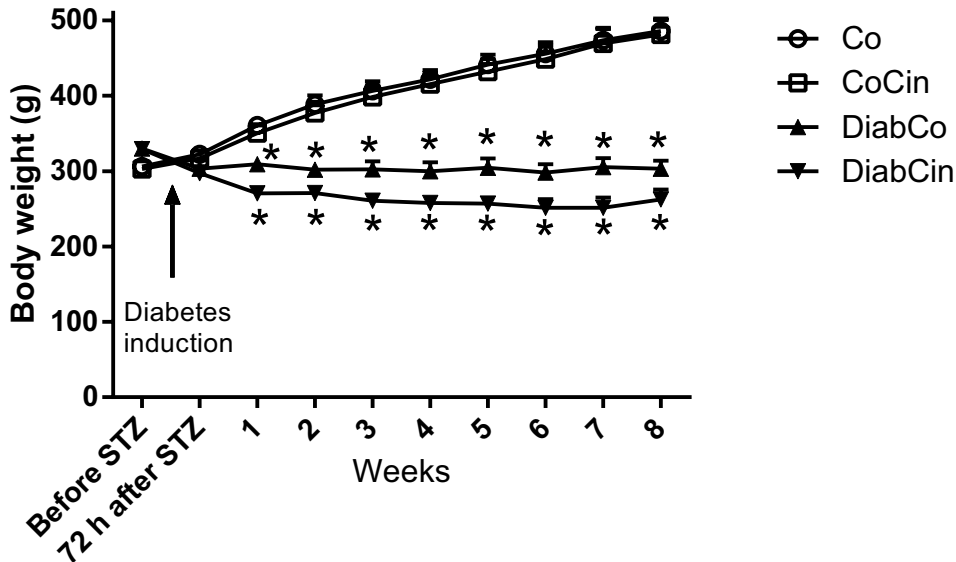

Supplement: MOESM2 [file 9760354]
